# Supplementary material for: Molecular basis for the inhibition of the methyl-lysine binding function of 53BP1 by TIRR
Source: PubMed Central journal article supplement (PMC6043480; doi:10.1038/s41467-018-05174-9), 2018-07-12
Supplement: 41467_2018_5174_MOESM1_ESM.pdf [file 41467_2018_5174_MOESM1_ESM.pdf]

**Molecular basis for the inhibition of the methyl-lysine binding function of 53BP1 by TIRR**

**Wang et al**

## Supplementary Information

Figure S1

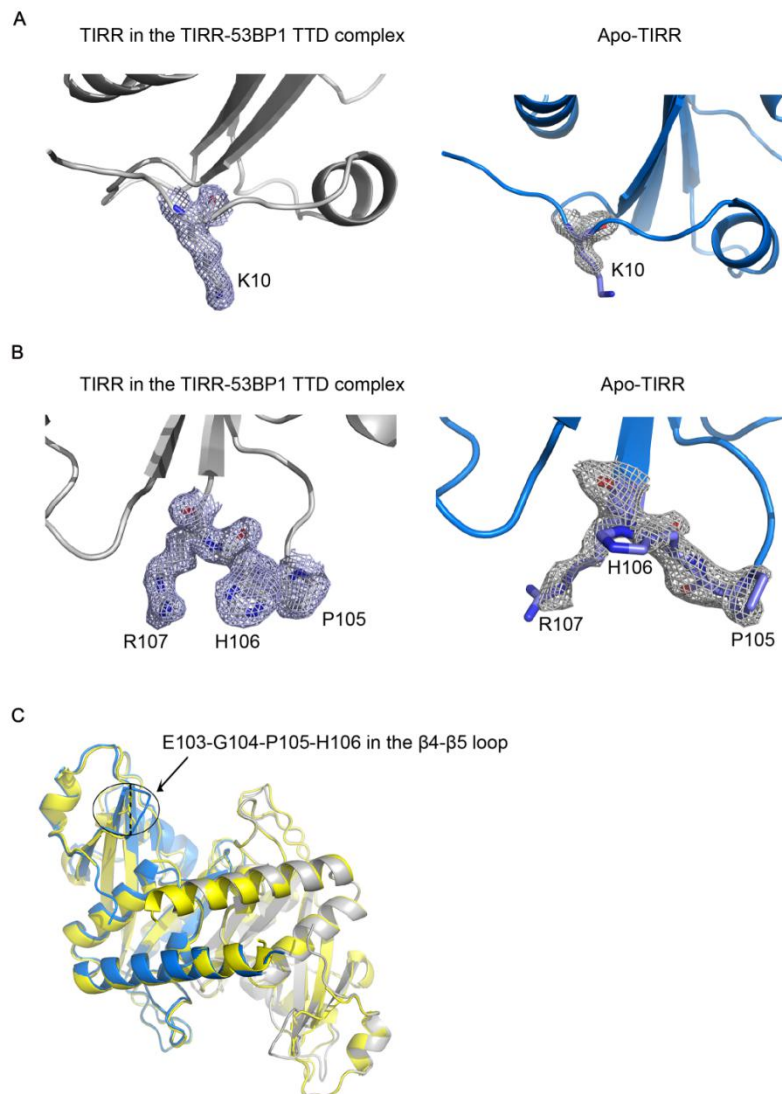

**Supplementary Fig. 1.** Structural analysis of TIRR. (A) The  $2Fo-Fc$  electron density map overlaying Lys<sup>10</sup> from TIRR (contoured at 1.0  $\sigma$  level). (B) The  $2Fo-Fc$  electron density maps covering the three residues Pro<sup>105</sup>-His<sup>106</sup>-Arg<sup>107</sup> and Lys<sup>10</sup> from TIRR (contoured at 1.0  $\sigma$  level). (C) Structure comparison of TIRR monomer in the TIRR-53BP1 complex and apo-TIRR (PDB ID: 3KVH). The TIRR monomer in the TIRR-53BP1 complex is in gray and blue. Apo-TIRR is in yellow. The overall folding of TIRR monomer is similar to apo-TIRR, except four residues (Glu<sup>103</sup>-Gly<sup>104</sup>-Pro<sup>105</sup>-His<sup>106</sup>) from  $\beta$ 4- $\beta$ 5 loop in the apo-TIRR form are in disordered conformation, which is marked by a black dashed line.

Figure S2

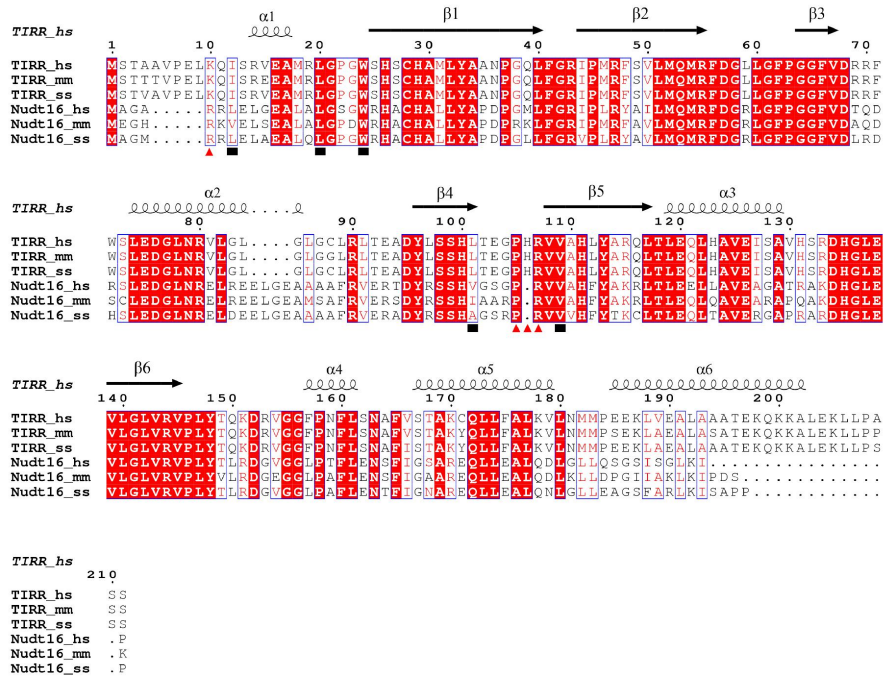

**Supplementary Fig. 2.** Sequence alignment of TIRR\_hs, TIRR\_mm, TIRR\_ss, Nudt16\_hs, Nudt16\_mm and Nudt16\_ss was performed using T-Coffee and the results were shown via ESPrpt. The residues involved in the TTD binding are underlined and in red triangles. TIRR\_hs, TIRR\_mm, TIRR\_ss are TIRRs from *Homo sapiens*, *Mus musculus* and *Sus scrofa* respectively. Nudt16\_hs, Nudt16\_mm and Nudt16\_ss are Nudt16 from *Homo sapiens*, *Mus musculus* and *Sus scrofa* respectively.

Figure S3

A

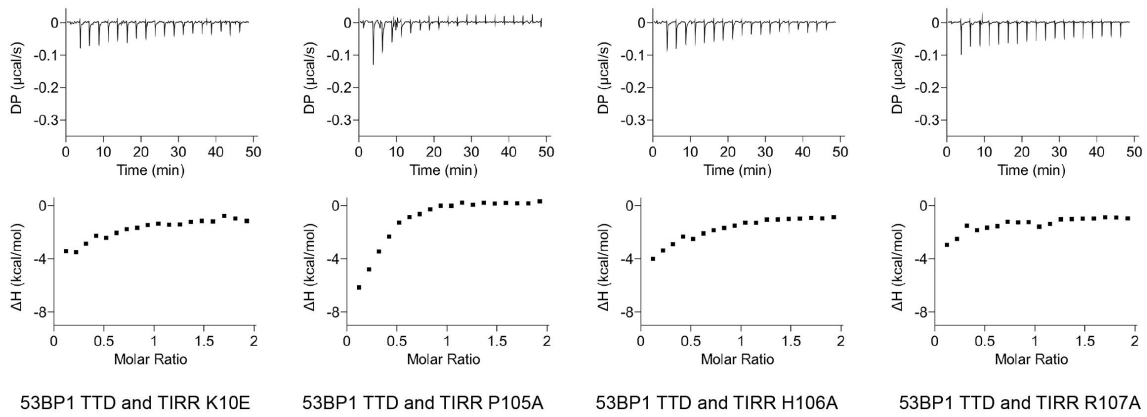

B

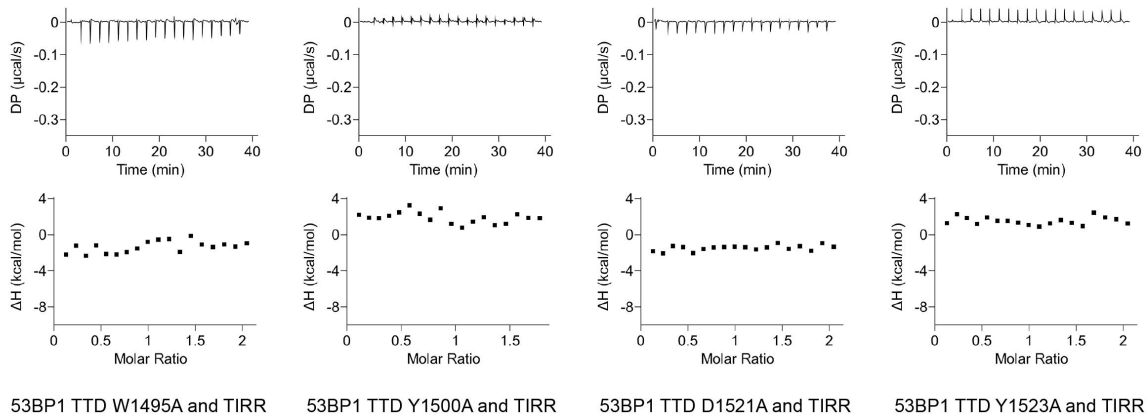

**Supplementary Fig. 3.** Binding affinity between 53BP1 TTD and TIRR. (A) The binding affinities between 53BP1 TTD and TIRR K10E, P105A, H106A and R107A (from left to right) were examined by ITC. (B) The binding affinities between TIRR and 53BP1 TTD W1495A, Y1500A, D1521A and Y1523A (from left to right) were examined by ITC.

Figure S4

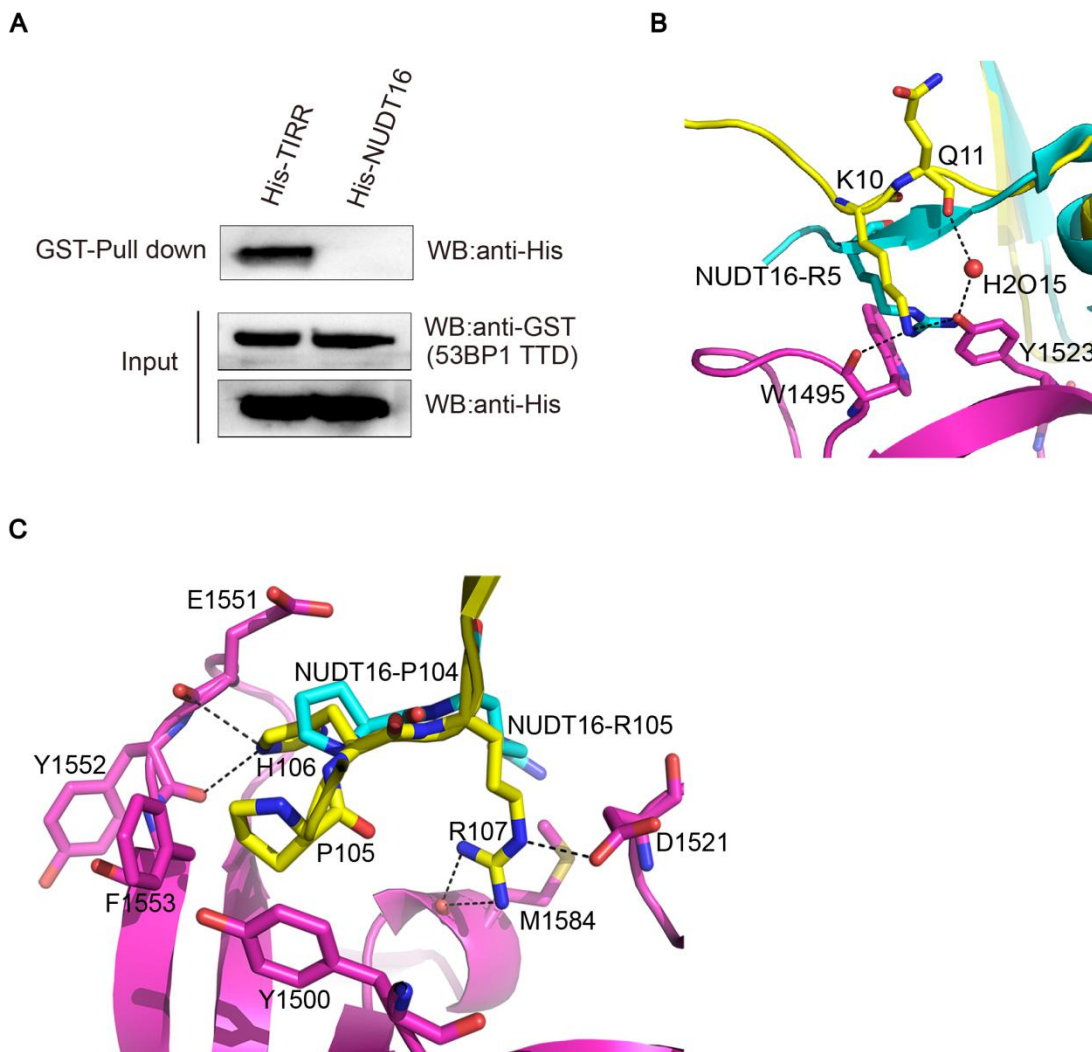

**Supplementary Fig. 4.** NUDT16 does not directly bind to 53BP1 TTD. (A) TIRR but not NUDT16 directly binds to 53BP1 TTD. In vitro interaction between Nudt16 and 53BP1 TTD was examined by GST pull down assay. (B and C) Superposition of the TIRR (yellow) in TIRR-TTD complex with NUDT16 (blue) in the N-terminus loop (B) and  $\beta$ 4- $\beta$ 5 loop (C). The key residues Lys<sup>10</sup>, Pro<sup>105</sup>, His<sup>106</sup> and Arg<sup>107</sup> from TIRR are in yellow stick. The corresponding residues Arg<sup>5</sup>, Pro<sup>104</sup> and Arg<sup>106</sup> from NUDT16 are in blue stick.

Figure S5

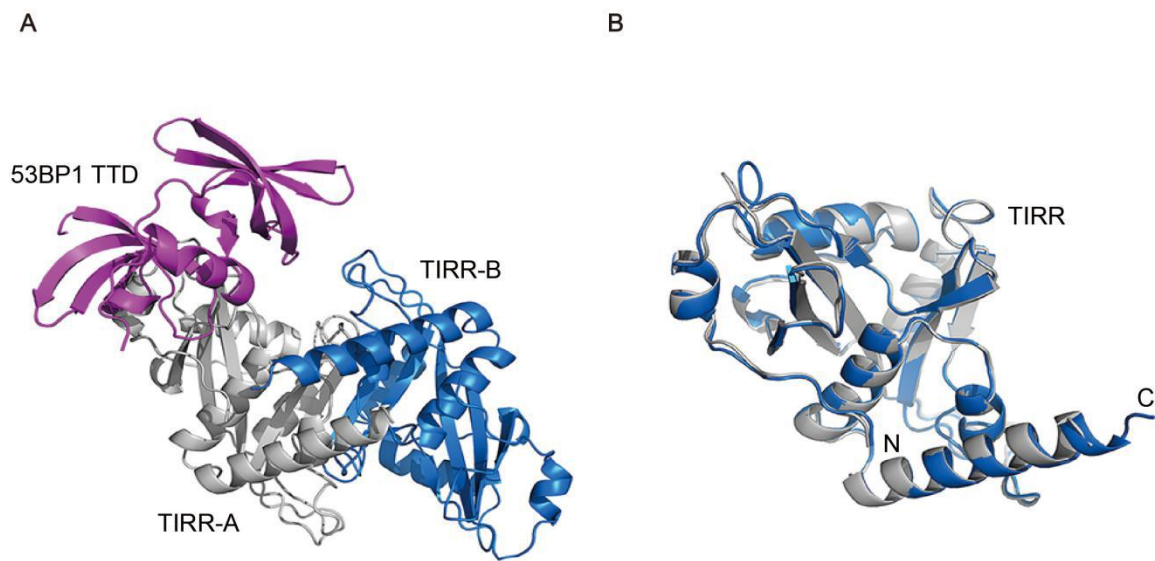

**Supplementary Fig. 5.** TIRR forms homodimer in the complex with 53BP1 TTD. (A) TIRR-A and TIRR-B are displayed as gray and blue respectively, TTD is shown as magenta. (B) Superposition of TIRR-A with TIRR-B.

Figure S6

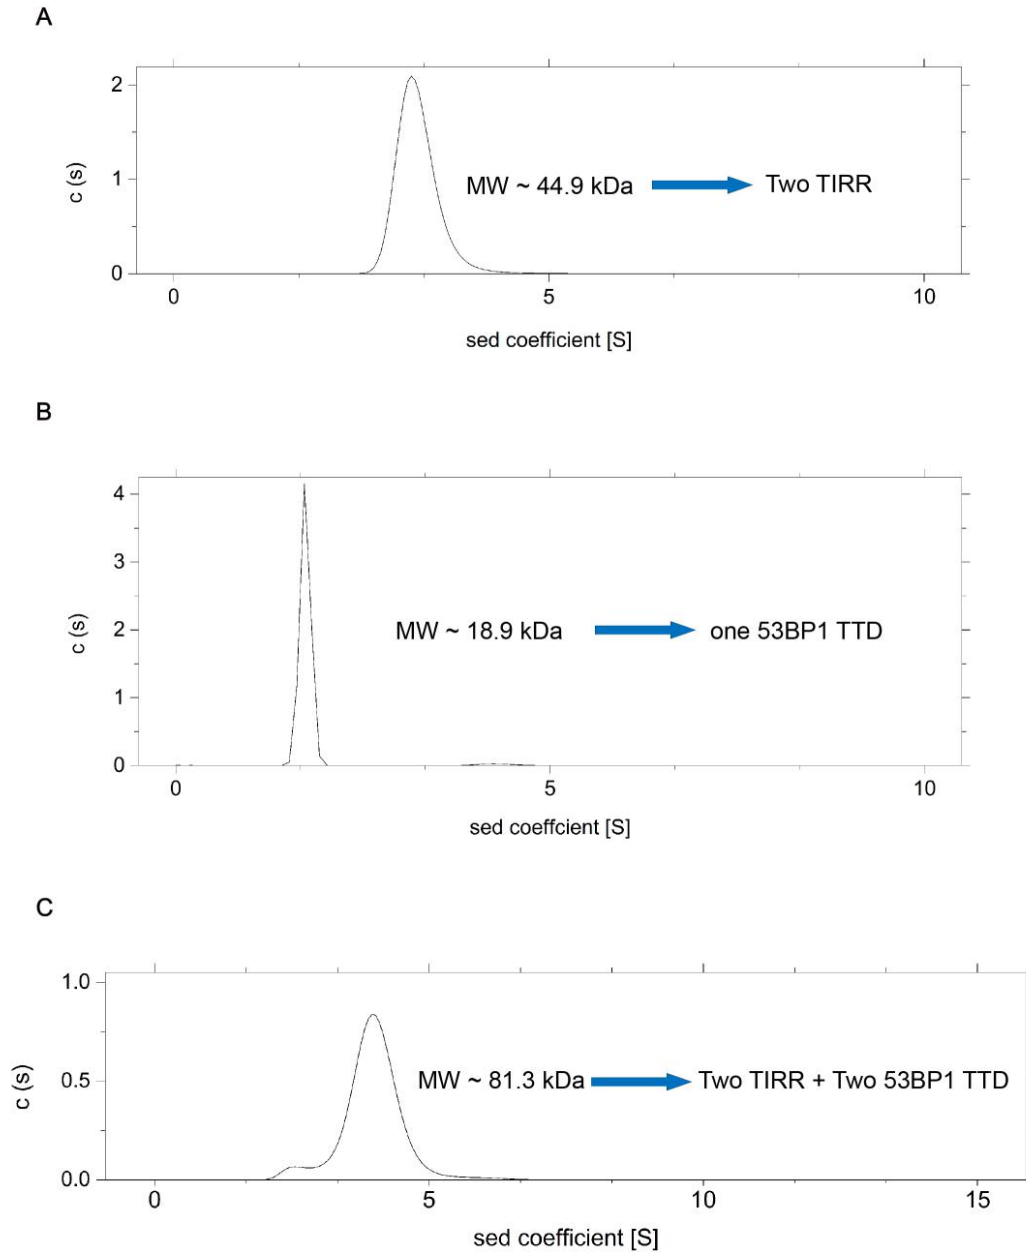

**Supplementary Fig. 6.** Analytical ultracentrifugation analysis. (A) The molecular weight of TIRR was determined to be 44.5 kDa, indicating that TIRR (22.9 kDa) exists as a homodimer in solution. (B) The molecular weight of 53BP1 TTD was measured to be 19.3 kDa, indicating that 53BP1 TTD (19.3 kDa) exists as monomer in solution. (C) Molecular weight of TIRR-53BP1 TTD complex was determined to be 81.3 kDa, indicating that this protein complex contains two TIRR molecules and two 53BP1 TTD molecules.

Figure S7

A

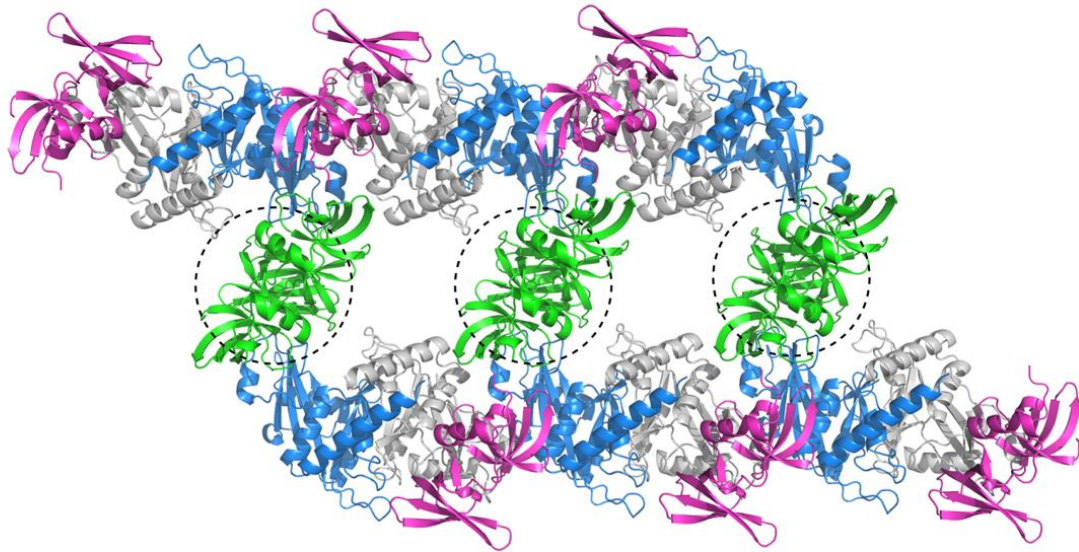

B

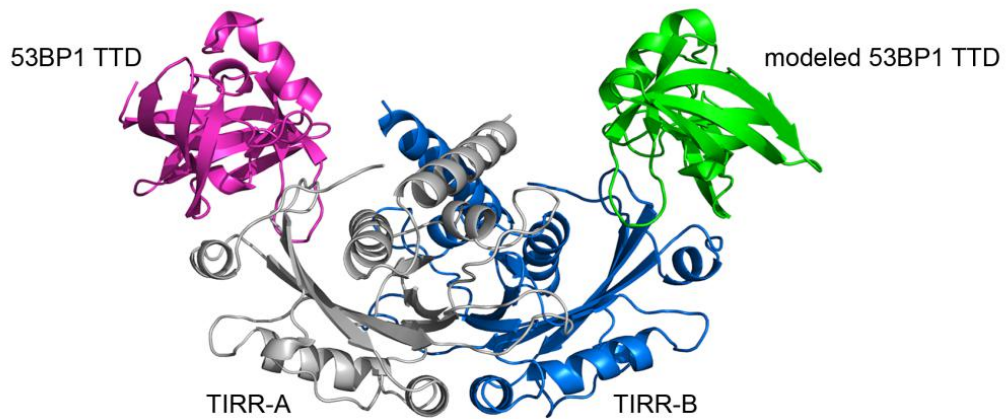

**Supplementary Fig. 7.** Modeling the second TTD molecule into the crystal structure of TIRR-TTD complex. (A) The modeled TTD molecules clash seriously in the crystal lattice. The clashed regions are marked using black dashed lines. (B) TIRR-53BP1 complex consists of two TIRR molecules and two TTD molecules. The TTD molecule (magenta) binds to the TIRR monomer A (gray), another TTD molecule (green) was modeled and binds to TIRR monomer B (blue).



Figure S8

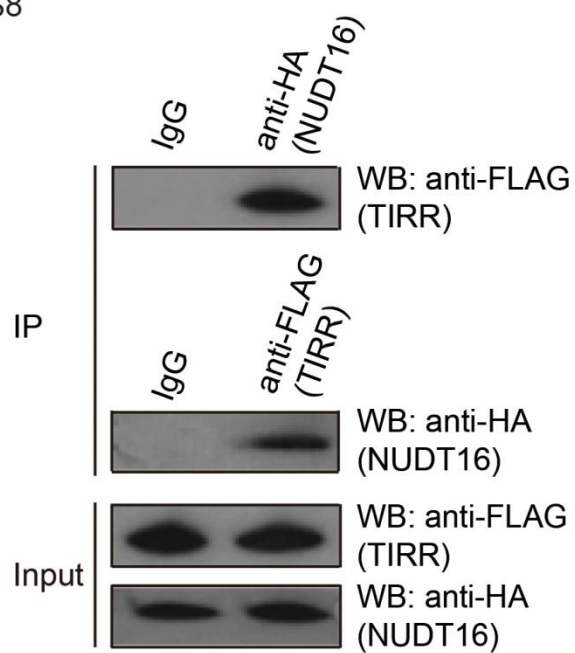

**Supplementary Fig. 8.** TIRR is associated with NUDT16. 293T cells were expressed SFB-TIRR and HA-NUDT16. The interaction between TIRR and NUDT16 was examined by IP and Western blot with indicated antibodies.

Figure S9

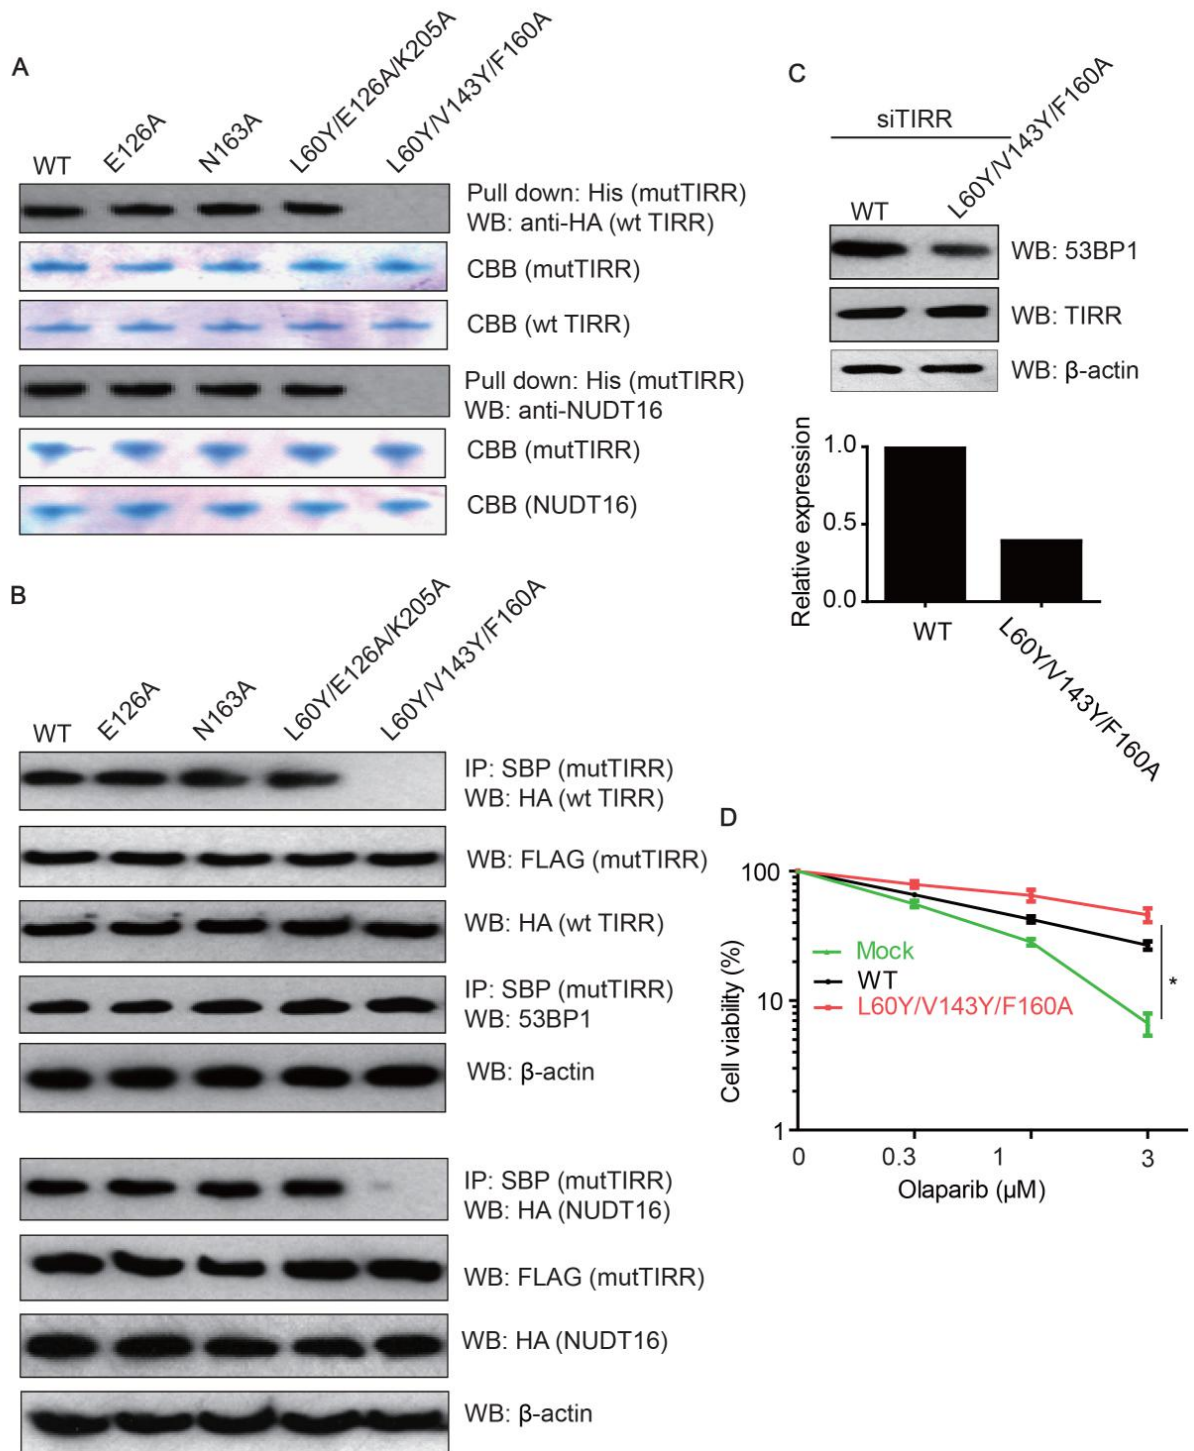

Figure S9

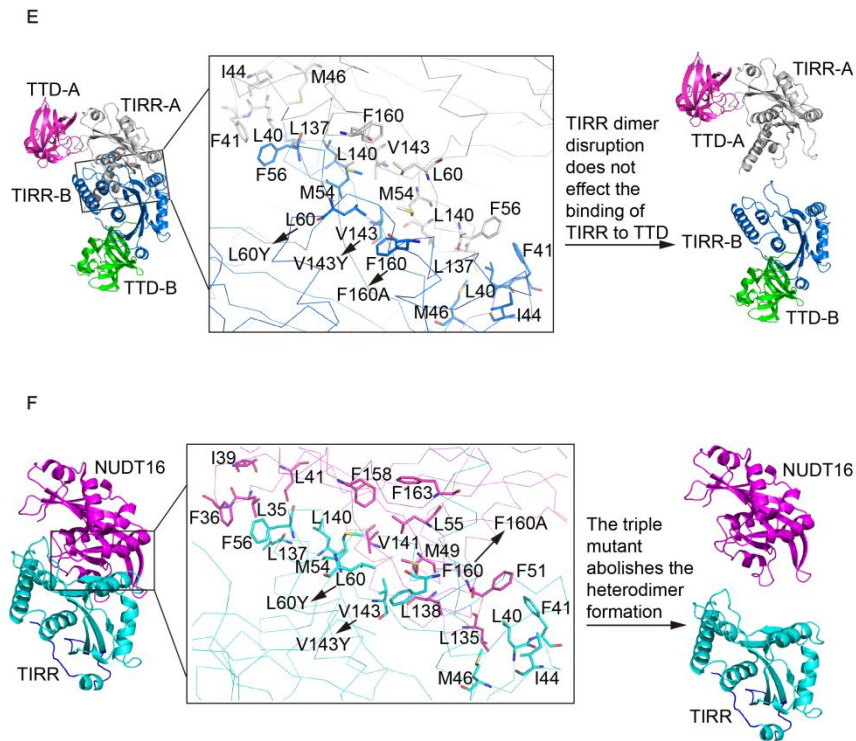

**Supplementary Fig. 9.** Dimer formation of TIRR. (A) The L60Y/V143Y/F160A mutation abolishes the TIRR homodimer or TIRR/NUDT16 heterodimer. The recombinant HIS tagged TIRR mutants were incubated HA tagged wild type TIRR or untagged NUDT16. The pull down and Western blot assays were performed. (B) SBP-TIRR mutants were co-expressed with HA-TIRR or HA-NUDT16 in U2OS cells. The co-IP and Western blot assays were performed with indicated antibodies. (C) U2OS cells were treated with siTIRR to knockdown endogenous TIRR. Wild type TIRR or the L60Y/V143Y/F160A mutant was reintroduced into the cells. The expression of 53BP1 and ectopic TIRR were examined by Western blot.  $\beta$ -actin was used as the protein loading control. (D) Wild type TIRR or the L60Y/V143Y/F160A mutant was expressed in UWB1 (BRCA1-deficient) cells. The cells were treated with indicated dose of olaparib (PARP inhibitor) for 6 days. Cell viability was examined. Data are represented as the mean  $\pm$  s.d. (n=3). \*:  $p < 0.05$ . (E) Structure of the TIRR-TTD complex dimer interface. The zoomed region shows the hydrophobic residues at the TIRR dimer interface. (F) The TIRR-NUDT16 heterodimer model and the heterodimer interface. The zoomed region shows the hydrophobic residues at the interface of the heterodimer.

Supplement S10

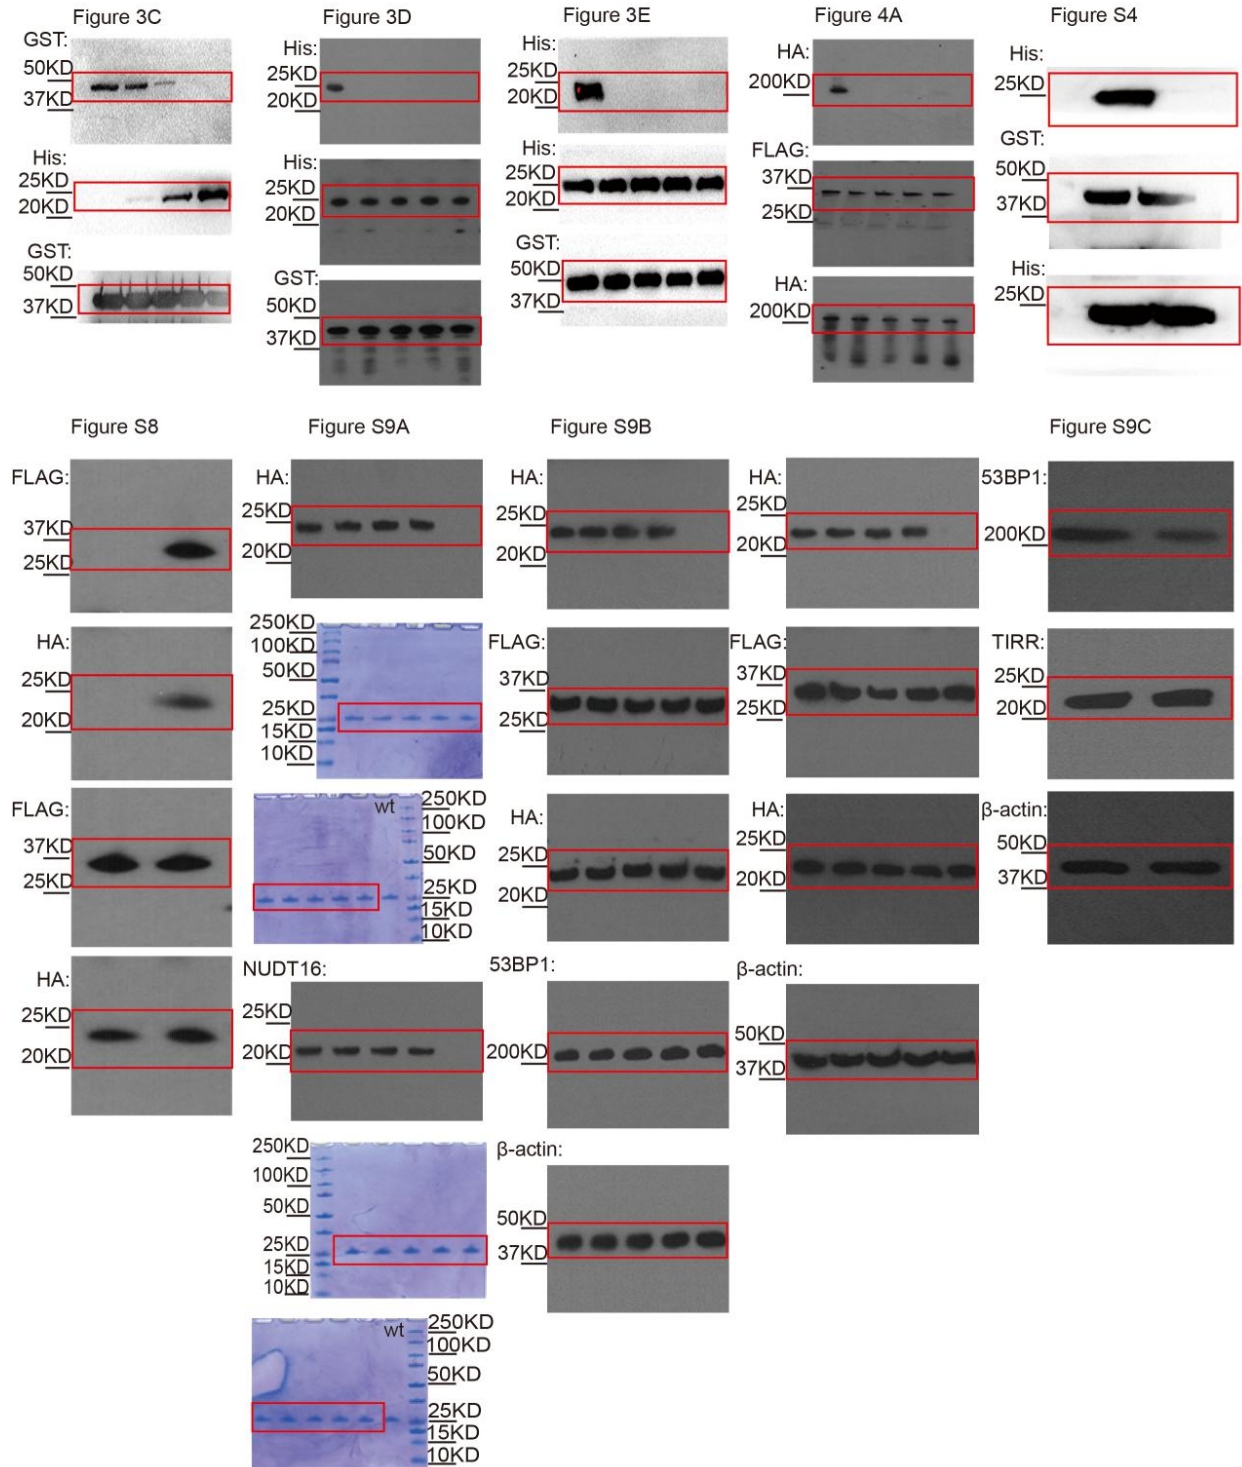

Supplementary Fig. 10. Original images of western blots and gels shown in this study.

**Supplementary Table 1. List of primers used in TIRR construct**

| Primer name        | Sequence (5' - 3')             |
|--------------------|--------------------------------|
| Human TIRR 1 F     | CGGGATCCATGTCGACGGCGGCGGTT     |
| Human TIRR 6 F     | CGGGATCCGTTCCGGAGCTGAAGCAGATC  |
| Human TIRR 211 R   | ACGTCACTCGAGTCAAGAGGAGGCCGGGAG |
| Human TIRR K10E F  | GTTCCGGAGCTGGAGCAGATCAGCCGG    |
| Human TIRR K10E R  | CCGGCTGATCTGCTCCAGCTCCGGAAC    |
| Human TIRR P105A F | CTGACCGAGGGCGCACACCGCGTCGTG    |
| Human TIRR P105A R | CACGACGCGGTGTGCGCCCTCGGTCAG    |
| Human TIRR H106A F | ACCGAGGGCCCAGCCCAGCGTCGTGGCG   |
| Human TIRR H106A R | CGCCACGACGCGGGCTGGGCCCTCGGT    |
| Human TIRR R107A F | AGGGCCACACGCCGTCGTGGCGCA       |
| Human TIRR R107A R | TGCGCCACGACGGCGTGTGGGCCCT      |
| Human TIRR L60Y R  | TTCGACGGGCTGTATGGCTTCCCCGGG    |
| Human TIRR L60Y F  | CCCGGGGAAGCCATACAGCCCGTCGAA    |
| Human TIRR V143Y R | GTGCTGGGCCTCTATCGGGTCCCGCTG    |
| Human TIRR V143Y F | CAGCGGGACCCGATAGAGGCCAGCAC     |
| Human TIRR F160A F | GGCTTCCCCAACGCCCTGAGCAACGCC    |
| Human TIRR F160A R | GGCGTTGCTCAGGGCGTTGGGGAAGCC    |
| Human TIRR E126A F | CTGCACGCCGTGGCGATCAGCGCGGTG    |
| Human TIRR E126A R | CACCGCGCTGATCGCCACGGCGTGCAG    |
| Human TIRR K205A F | AAGGCCCTGGAGGCGTTGCTCCCCGGCC   |
| Human TIRR K205A R | GGCCGGGAGCAACGCCTCCAGGGCCTT    |
| Human TIRR N163A F | AACTTCCTGAGCGCCGCCTTCGTGAGC    |
| Human TIRR N163A R | GCTCACGAAGGCGGCGCTCAGGAAGTT    |

**Supplementary Table 2. List of primers used in 53BP1 construct**

| Primer name          | Sequence (5' - 3')                   |
|----------------------|--------------------------------------|
| Human 53BP1 1459 F   | CGGGATCCCGTAGTGACTCTCCAGAAATTC       |
| Human 53BP1 1643 R   | ACGTCACTCGAGCTAGCTGACGTTACTGCGCCGTTT |
| Human 53BP1 W1495A F | GTTGTAGCCAAGGCGTCATCCAATGGC          |
| Human 53BP1 W1495A R | GCCATTGGATGACGCCTTGGCTACAAC          |
| Human 53BP1 D1500A F | TCATCCAATGGCGCCTTTTACTCTGGG          |
| Human 53BP1 D1500A R | CCCAGAGTAAAAGGCGCCATTGGATGA          |
| Human 53BP1 W1521A F | ATTGCTCTTTGATGCTGGGTACGAATGTG        |
| Human 53BP1 W1521A R | CACATTCGTACCCAGCATCAAAGAGCAAT        |
| Human 53BP1 W1523A F | CTTTGATGATGGGGCCGAATGTGATGTG         |
| Human 53BP1 W1523A R | CACATCACATTCGGCCCCATCATCAAAG         |
| Human 53BP1 W1553A F | GAGGATGAGTATGCCAGTGCAGGAGTG          |
| Human 53BP1 W1553A R | CACTCCTGCACTGGCATACTCATCCTC          |

**Supplementary Table 3. List of antibodies**

| Antibody             | Company                   | (Cat.No.)  | Source            | Application                      | Dilution |
|----------------------|---------------------------|------------|-------------------|----------------------------------|----------|
| anti-GST             | ZSGB-BIO                  | TA-02      | Mouse monoclonal  | Immunoblot                       | 1:1000   |
| anti-His             | ZSGB-BIO                  | TA-03      | Mouse monoclonal  | Immunoblot                       | 1:1000   |
| anti-HA              | BioLegend                 | MMS-101P   | Mouse monoclonal  | Immunoblot                       | 1:1000   |
| anti-Flag            | Sigma                     | F3165      | Mouse monoclonal  | Immunoblot                       | 1:1000   |
| anti-53BP1           | Cell Signaling Technology | 4937s      | Rabbit polyclonal | Immunoblot<br>Immunofluorescence | 1:1000   |
| anti-RIF1            | GeneTex                   | GTX131889  | Rabbit polyclonal | Immunofluorescence               | 1: 500   |
| anti- $\gamma$ H2AX  | Milipore                  | 16-202A    | Mouse monoclonal  | Immunofluorescence               | 1:1000   |
| anti-PRA2            | Cell Signaling Technology | 2208S      | Rabbit polyclonal | Immunofluorescence               | 1:100    |
| anti-RAD51           | Novus Biologicals         | NBP2-32622 | Rabbit polyclonal | Immunofluorescence               | 1: 200   |
| anti-NUDT16          | proteintech               | 12889-1-AP | Rabbit polyclonal | Immunoblot                       | 1:1000   |
| anti- $\beta$ -actin | Sigma                     | A5441      | Mouse monoclonal  | Immunoblot                       | 1:2000   |
